# Supplementary material for: CO2 to CO Electroreduction, Electrocatalytic H2 Evolution, and Catalytic Degradation of Organic Dyes Using a Co(II) meso-Tetraarylporphyrin
Source: MDPI journal article supplement (doi:10.3390/molecules27051705), 2022-03-05
Supplement: s1 [file s1]

## Supplementary Materials

for

CO<sub>2</sub> to CO Electoreduction, electrocatalytic H<sub>2</sub> evolution, and catalytic degradation  
of organic dyes using a Co(II) *meso*-tetraarylporphyrin

Mouhieddine Guergueb <sup>1,\*</sup>, Frédérique Loiseau <sup>2</sup>, Florian Molton <sup>2</sup>, Habib Nasri<sup>1</sup>, Axel Klein <sup>3,\*</sup>

<sup>1</sup> University of Monastir, Faculty of Sciences of Monastir, Avenue de l'Environnement, 5019 Monastir, Tunisia. Dr. Habib Nasri, email: habib.nasri@fsm.rnu.tn, ORCID: 0000-0002-7565-8240 (H.N.)

<sup>2</sup> Département de Chimie Moléculaire (DCM), CNRS UMR 5250, Université Grenoble Alpes, F-38000 Grenoble, France. Prof. Dr. Frederic Loiseau, email: frederique.loiseau@univ-grenoble-alpes.fr, ORCID: 0000-0003-3648-4863 (F.L.); Florian Molton, email: florian.molton@univ-grenoble-alpes.fr; ORCID: 0000-0001-6675-5551 (F.M.)

<sup>3</sup> University of Cologne, Faculty of Mathematics and Natural Sciences, Department of Chemistry, Institute for Inorganic Chemistry, Cologne, Germany

\* Corresponding authors: Dr. Mouhieddine Guergueb, email: mouhieddineguergueb@gmail.com, ORCID: 0000-0001-7583-3099 (M.G.), Prof. Dr. Axel Klein, email: axel.klein@uni-koeln.de, ORCID: 0000-0003-0093-9619 (A.K.)

### contents:

**Figure S1.** FT-IR spectrum of [Co(TMFPF)].

**Figure S2.** <sup>1</sup>H NMR spectrum of [Co(TMFPF)] (C ~10<sup>-3</sup> M) in CDCl<sub>3</sub> at room temperature.

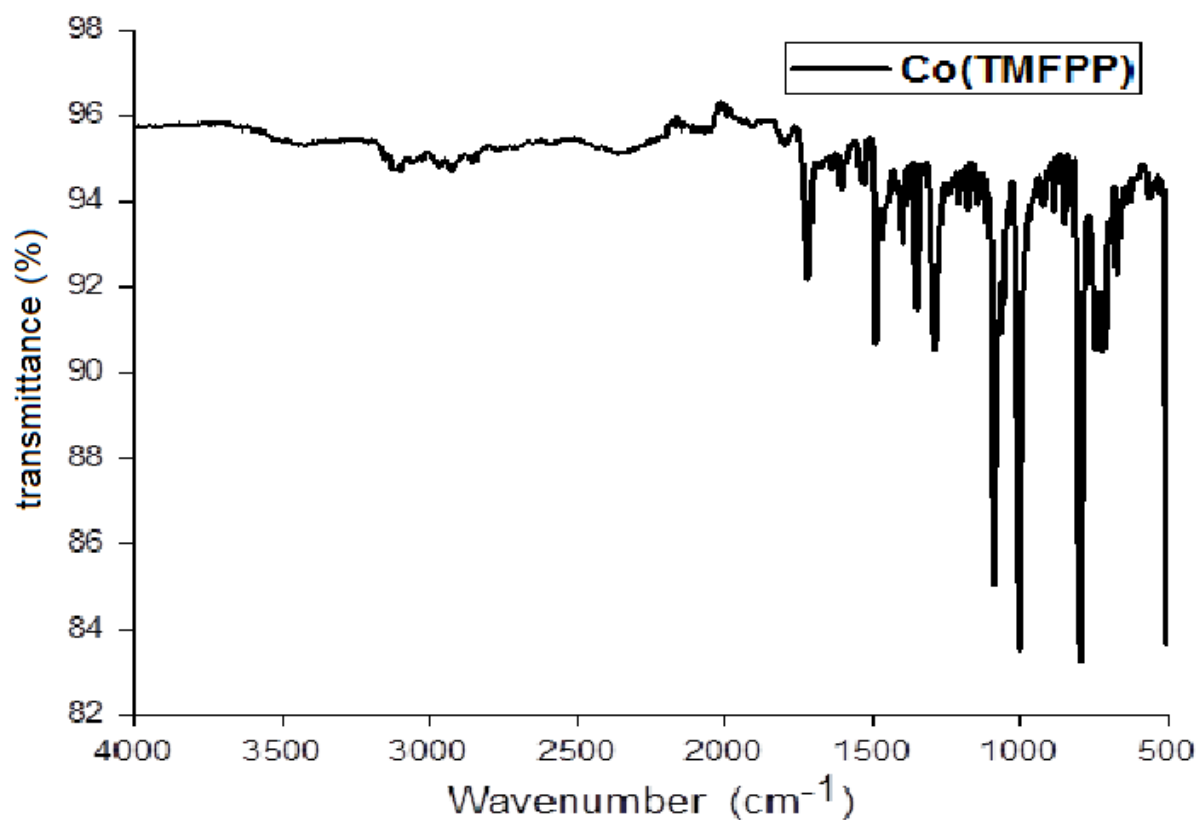

Figure S1. FT-IR spectrum of a solid sample of [Co(TMFPF)].

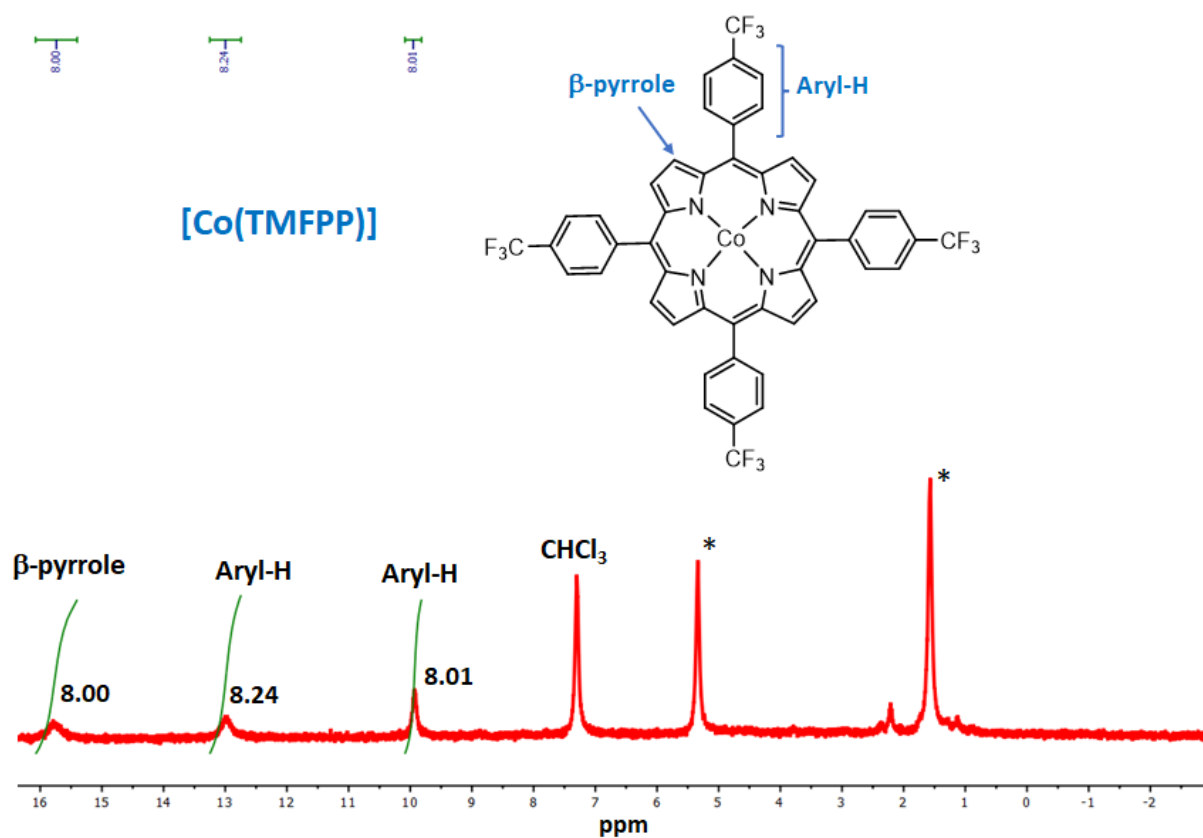

Figure S2.  $^1\text{H}$  NMR spectrum of [Co(TMFPF)] ( $C \sim 10^{-3}$  M) in  $\text{CDCl}_3$  at room temperature.
